# Supplementary material for: Disrupting the physical interaction between serotonin transporter and soluble guanylate cyclase produces a fast–acting antidepressant activity
Source: Research Square preprint supplement (doi:10.21203/rs.3.rs-8689963/v1), 2026-02-10
Supplement: Supplementary file 1 [file 1dc3dddd32901e175a4cede6.docx]

Supplementary Materials for

**Disrupting the physical interaction between serotonin transporter and soluble guanylate cyclase produces a fast–acting antidepressant activity**

Xingyu Huang *et al*.

*Corresponding author. Email: [yuanwei.zhang@gzhu.edu.cn](mailto:yuanwei.zhang@gzhu.edu.cn)

**This PDF file includes:**

Supplementary Materials and Methods

Figs. S1 to S8

**Supplementary Materials and Methods**

**Cell culture and transfection**

RBL–2H3 cells (ATCC) were cultured with minimum essential medium supplemented with 15% fetal bovine serum, 100 units/mL penicillin, and 100 µg/mL streptomycin at 37 ℃ in a humidified 5% CO2 incubator. HeLa cells were cultured in Dulbecco’s modified Eagle’s medium supplemented with 10% fetal bovine serum, 100 units/mL penicillin, and 100 µg/mL streptomycin at 37 ℃ in a humidified 5% CO2 incubator. Cells grown at ~70% confluence in a 6–cm culture dish were transfected with SERT, sGC, or SEC24C cDNA by lipofectamine 2000. HeLa stable cell line for C–terminally Flag–tagged SERT was generated as described previously (71). The stable cells were maintained in DMEM supplemented with 10% fetal bovine serum, 100 units/mL penicillin, 100 μg/mL streptomycin, and 12 μg/mL blasticidin S at 37 °C in a humidified 5% CO2 incubator.

**RT–PCR and qPCR**

Total RNA from RBL–2H3 cells or C57BL/6 mouse midbrain were extracted using FastPure Cell/Tissue Total RNA Isolation Kit (Vazyme) according to the manufacturer's protocol. One microgram of total RNA was subjected to reverse transcription followed by PCR using the HiScript II One Step RT–PCR Kit (Vazyme) or qPCR using SYBR Green Pro Taq HS (Accurate Biology) on QuantSrudio 3 (ThermoFisher). The oligonucleotide primers for PCR or qPCR are forward, atgttctgcaggaagttcaaagatc, reverse, tcacggtccagcatgaagtggaatg for sGCα1; forward, tgcatgcacccttatctccgcagtc, reverse, ttccaacaatgcatcgaagccattg for sGCα2; forward, catggcactgagatagacatgaagg, reverse, cactgaagaggatggtcacattgtc for sGCβ1; forward, tcgaagaggaggtgttctgtgatgc, reverse, acctgctaagactggtccagtgtgg for sGCβ2. Gene expression was normalized to β–actin gene as a reference.

**Molecular Docking**

The high–resolution structures of SERT (PDB ID, 6DZW) in an outward–open conformation (76) and heterodimeric sGCα1/β1 (7D9S) (77) were employed for molecular docking using a standard protocol in ZDOCK v3.0.2 (78). Both structures were prepared by removing solvent molecules, followed by optimizing the hydrogen bonding network, conformation of bonds, and energy constraints. In order to ensure the authenticity of connection, we retained 5–HT, HEME, Na+ and Mg2+ during the docking process. Docking was performed using SERT–IL4 motif as an anchoring point. Spatial blocking was applied to the N‑terminus of SERT and the catalytic domains of sGCα1/β1 subunits. Additionally, docking poses that result in steric clashes between sGC and the plasma membrane were systematically excluded. One pose with the best score was selected and exported into PyMOL v3.1 (Schrödinger Inc.) for visualization.


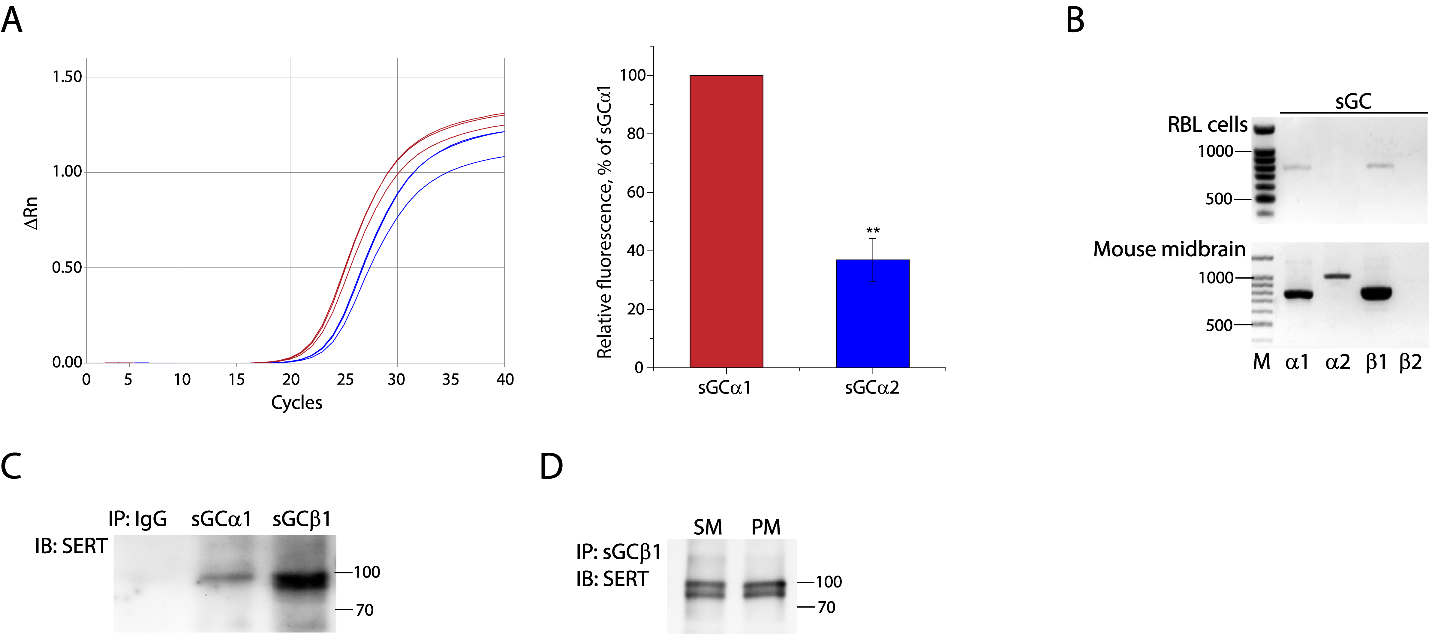


**Fig. S1. The expression of sGC and its interaction with SERT. (A)** Amplification plots of sGCα1 (*red*) and sGCα2 genes (*blue*). The amplification curve shows a representative experiment. Gene expressions of sGCα1 and sGCα2 were quantified as expressed by a relative fluorescence of gene products of qPCR. The experiments were repeated twice with similar results. Error bars represent mean ± SEM (*n* = 3). ***p* < 0.01, compared to sGCα1. **(B)** Agarose gel analysis of qualitative RT–PCR on total RNA isolated from RBL–2H3 cells (*upper*) and mouse midbrain (*lower*). b.p., base pairs; M, DNA markers. **(C)** Co–immunoprecipitation of protein complexes from RBL–2H3 cell extracts with IgG (*leftmost*), anti–sGCα1 (*middle*) or anti–sGCβ1 antibody (*rightmost*), followed by immunoblot analysis using anti–SERT antibody. **(D)** Subcellular distribution of the SERT–sGCβ1 association. Proteins in the subcellular membrane (SM) or plasma membrane (PM) were separated by biotinylation of RBL–2H3 cells using a plasma membrane–impermeant reagent sulfo–NHS–SS–biotin. Immunoprecipitation of membrane protein complexes was performed with anti–sGCβ1, followed by immunoblot analysis using anti–SERT antibody, respectively. Data are representatives of three independent experiments.


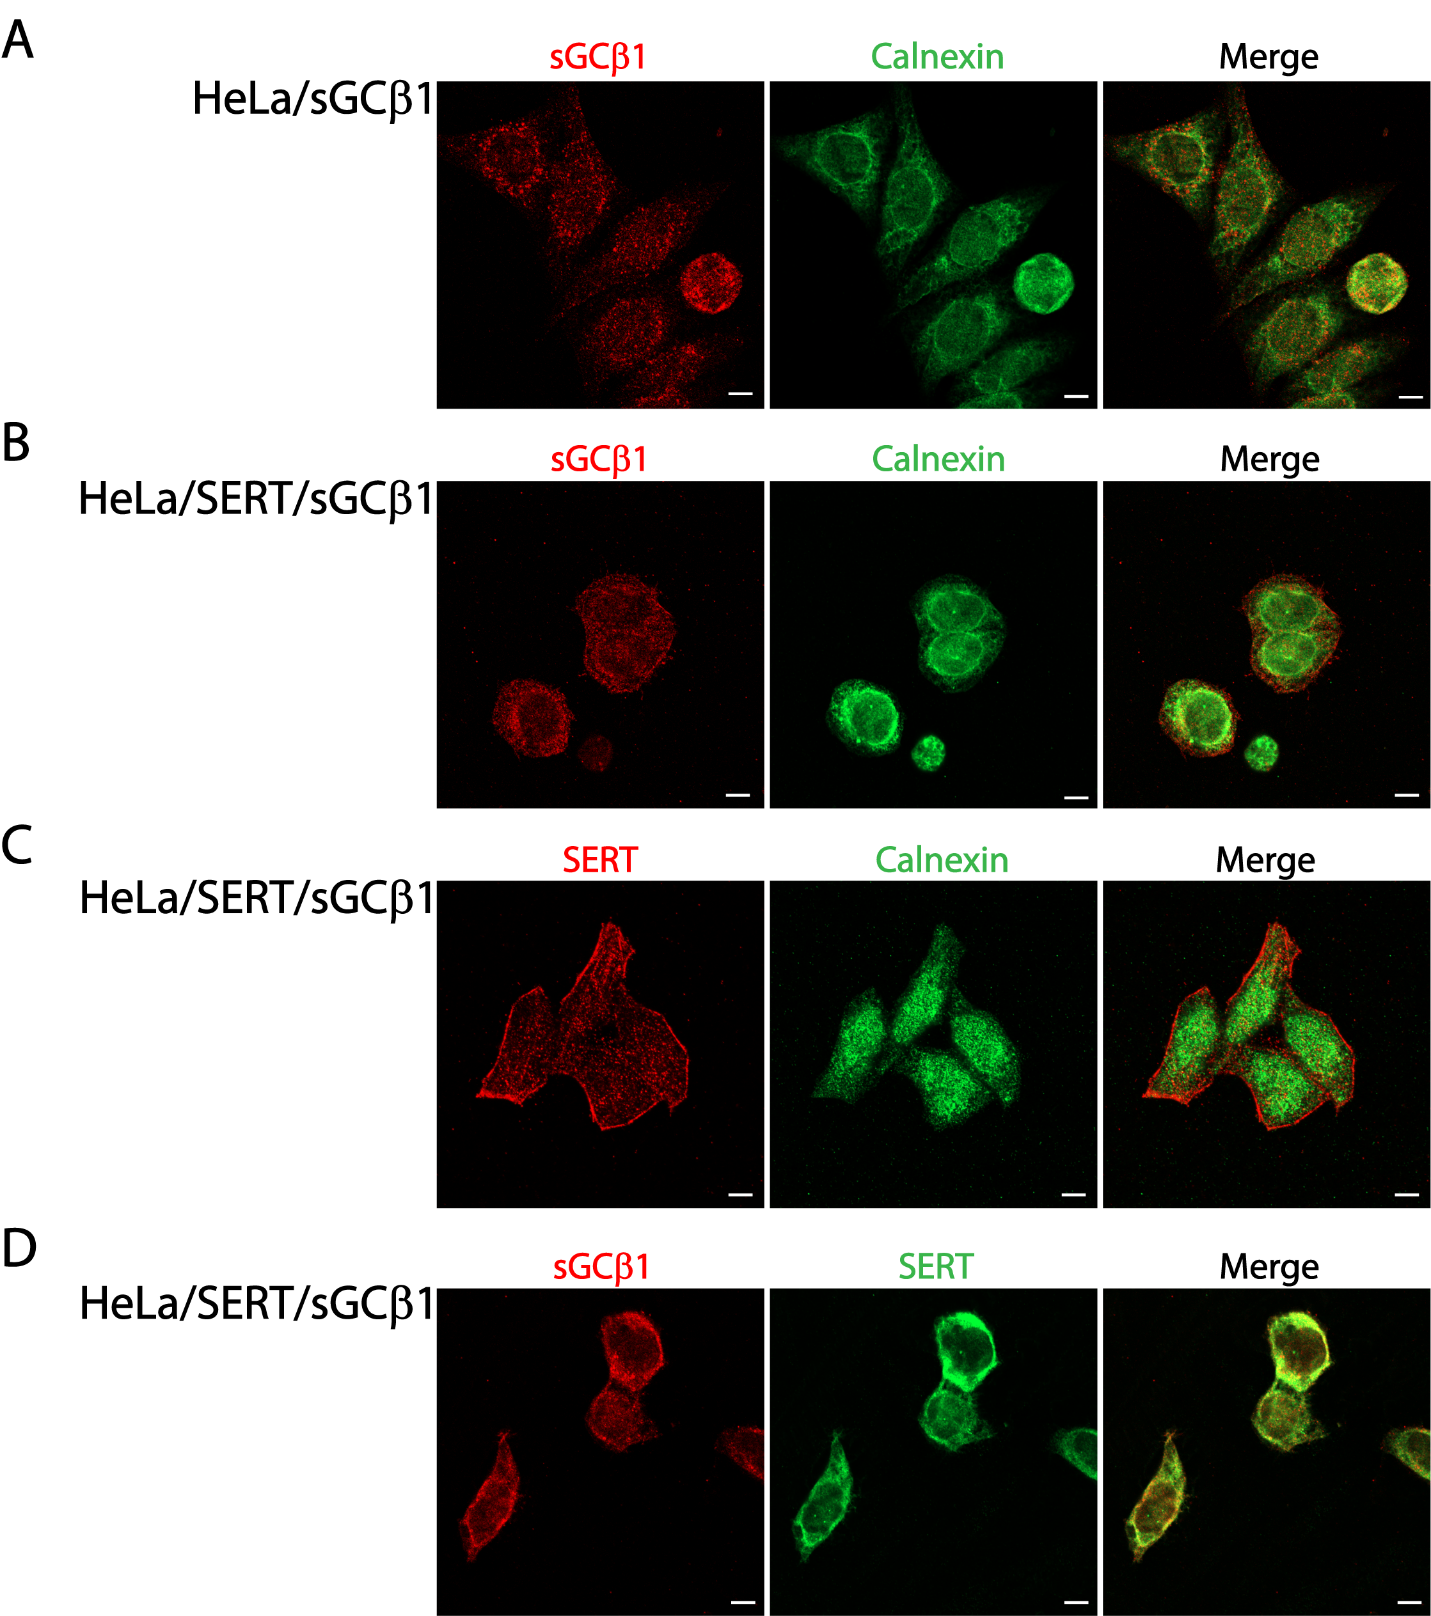


**Fig. S2. Double immunocytochemistry labeling of sGCβ1, calnexin, and SERT.** HeLa or HeLa–SERT stable cells transiently transfected with a plasmid encoding sGCβ1were fixed, permeabilized, stained, and imaged by confocal microscopy. Scale bars represent 10 μm. Data are representatives of three independent experiments.


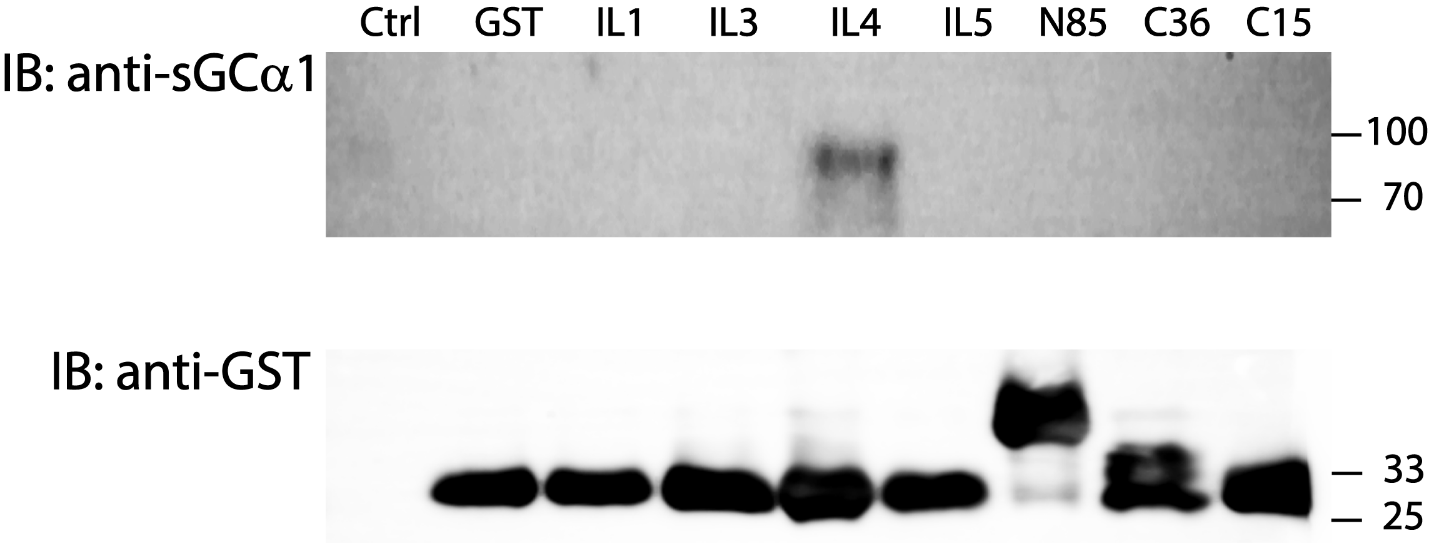


**Fig. S3. sGCα1 specifically associates with SERT–IL4.** Immunoblot analysis of elutes from glutathione affinity beads after incubation with GST–fused SERT internal fragments and sGCα1 was performed using anti–sGCα1 (*upper*) or anti–GST antibody (*lower*). Ctrl, control with *E. coli* cells without transformation. Blots were representatives of three independent experiments.


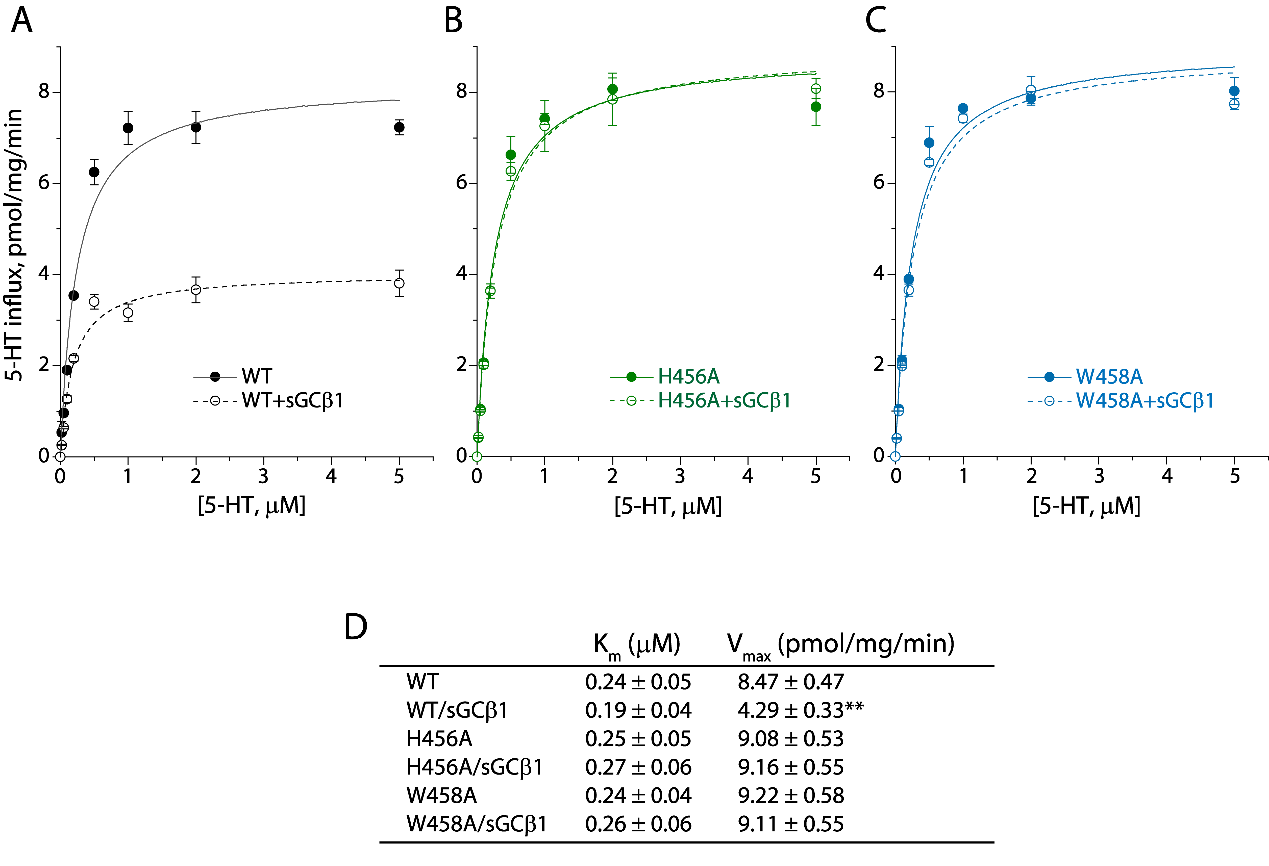


**Fig. S4. Effects of sGCβ1 co–expression on kinetic parameters of SERT WT, H456A and W458A mutants.** HeLa cells were transiently co–transfected with a plasmid encoding SERT WT, H456A, or W458A and an empty vector or a plasmid encoding sGCβ1 **(A, B, C)** and grown to full conference in 96–well plates. Transport assay was performed by incubating the cells with a range of 5–HT concentrations (0–5 μM) at 22 °C for 10 min and accumulated 5–HT in the cells was measured by a scintillation counter. The graphs show representative experiments with triplicate measurements. The *Km* and *Vmax* values in **(D)** represent mean ± SEM (*n* = 3). ***p* < 0.01, compared to the *Vmax* value for SERT WT without co–expression with sGCβ1.


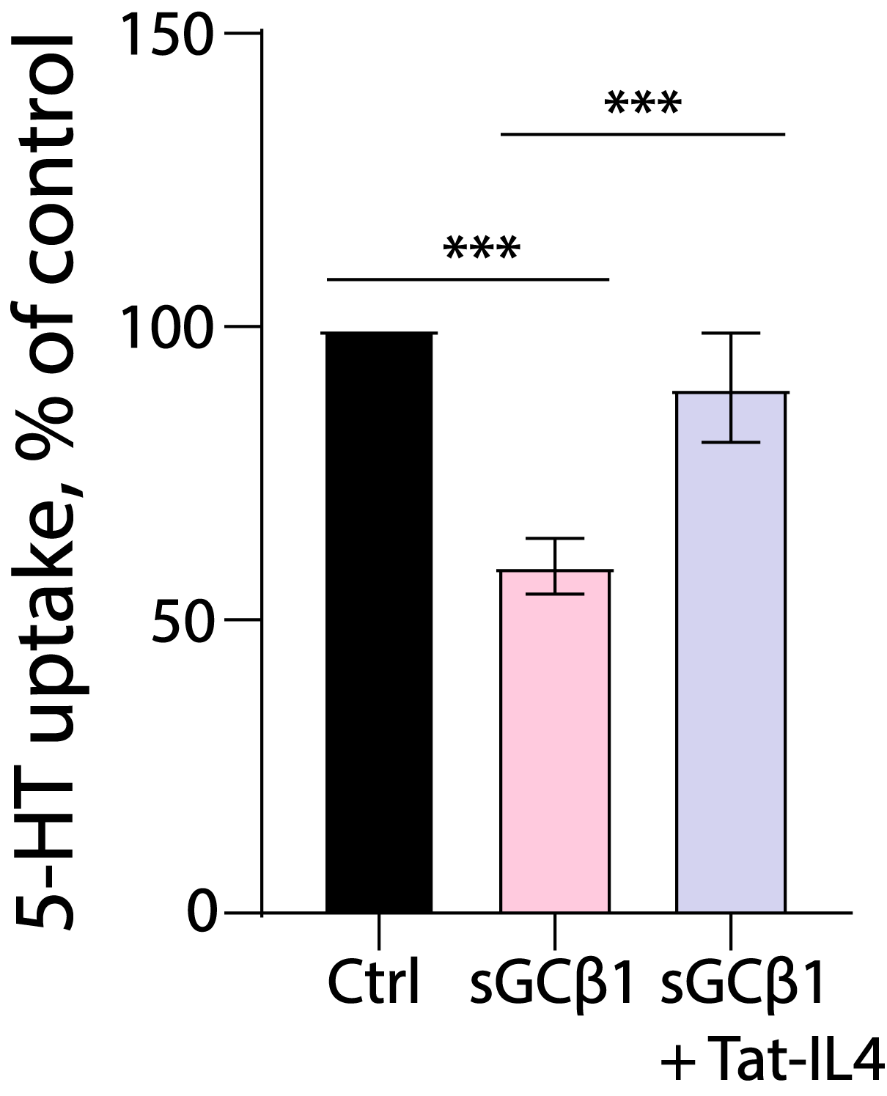


**Fig. S5. Effect of Tat–IL4 displacement on 5–HT uptake.** HeLa–SERT stable cells were transiently transfected with or without a plasmid encoding sGCβ1 and incubated with 1 μM Tat–IL4 at 37 °C for 3 hours. Transport assay was initiated by adding 20 nM [3H]5–HT and incubating at 22 °C for 10 min. Ctrl, control cells without sGCβ1 transfection. Error bars represent the mean ± SEM (*n* = 3). ****p* < 0.001.


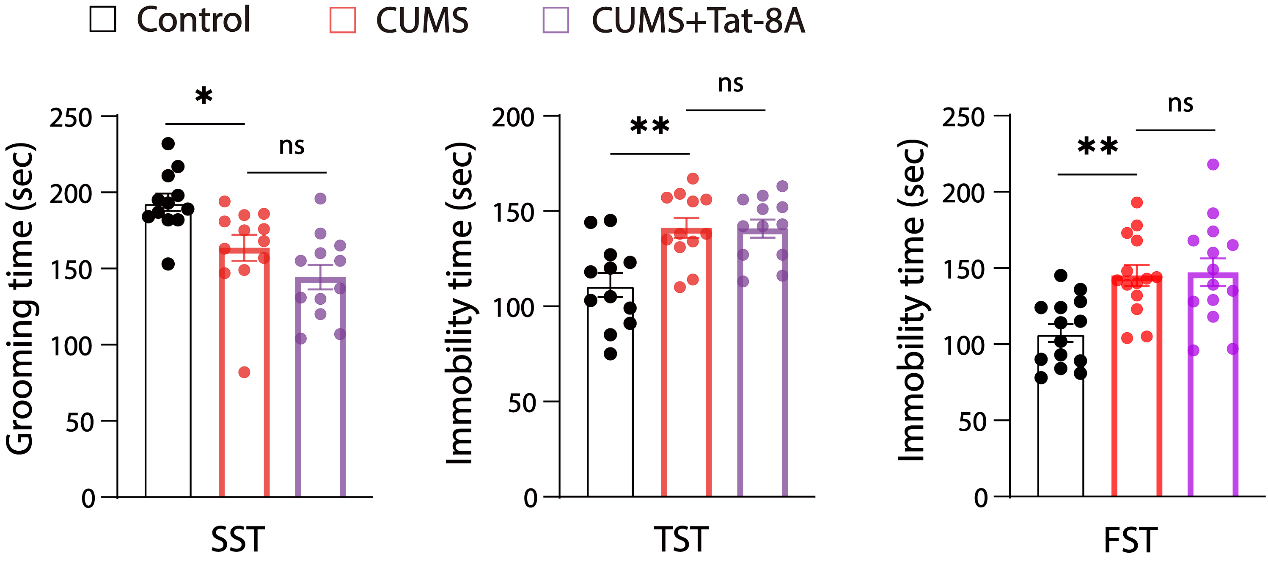


**Fig. S6. Effects of administration of a control peptide (Tat–8A) on animal behaviors.** Mice were exposed to a CUMS procedure for 4 weeks and their behaviors were evaluated by SST, FST, and TST 2 hours after a single injection of saline or Tat–8A, respectively. **p* < 0.05; ***p* < 0.01; ns, not significant (*n* =12).


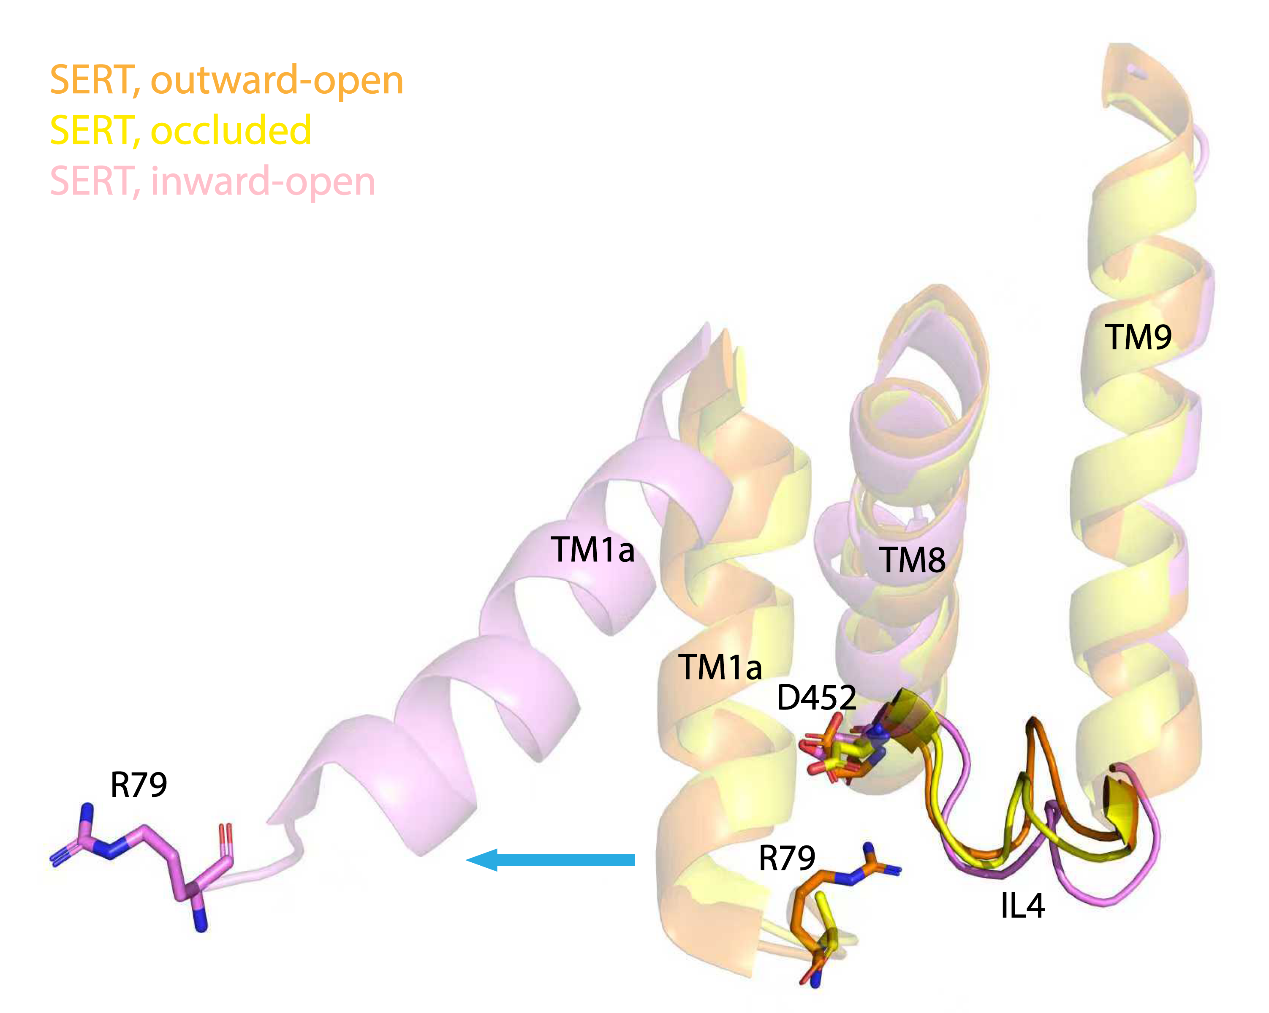


**Fig. S7. Superimposition of SERT structures in different conformational states.** Figure shows astructural superimposition of several fragments of SERT, including TMs1a, 8, 9, and IL4 motif in outward–open (PDB, 6DZZ), occluded (5I6X), and inward–open (6DZW) conformations. The cyan arrow represents the movement of TM1a when SERT converts from an outward–open to an inward–open conformation.


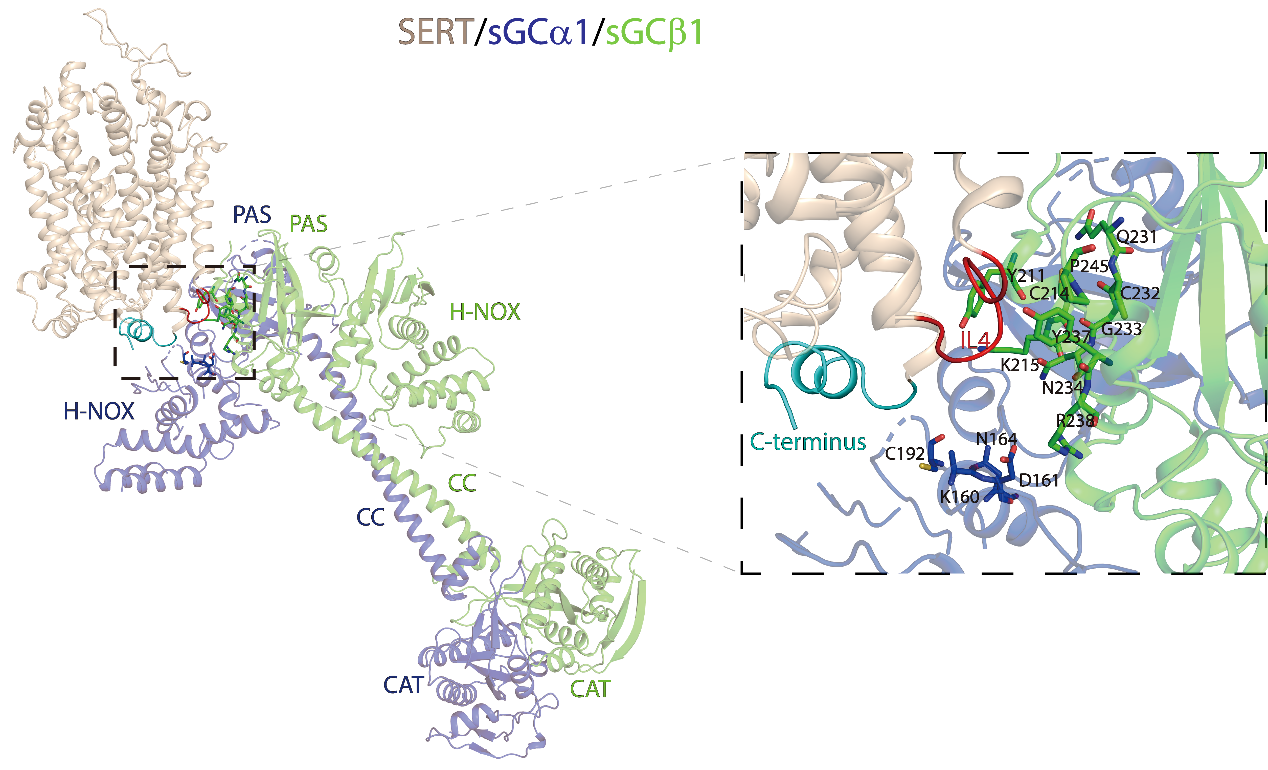


**Fig. S8. Molecular docking of the IL4–mediated SERT–sGC association.** Docking of the SERT–sGC association was performed using SERT–IL4 motif as an anchoring point. The residues in sGC contributing to the interface interactions with SERT–IL4 include K160, D161 N164, and N192in sGCα1 pseudo H–NOX domain and Y211, C214, K215, Q231, C232, G233, N234, Y237, R238, Q244, and P245 in sGCβ1 PAS domain in a sGC heterodimer, as indicated in a dotted edge square.
